# Supplementary material
Source: PubMed Central journal article supplement (PMC2761977)
Supplement: NIHMS146902-supplement-1_si_001.pdf [file NIHMS146902-supplement-1_si_001.pdf]

**Figure S1.** Scatter plots of collision cross sections vs. energy for 200 conformations sampled from MD simulations. a) 24:0-24:0 PC, b) 18:0-16:0 PC, and c) 16:0-22:6 PC

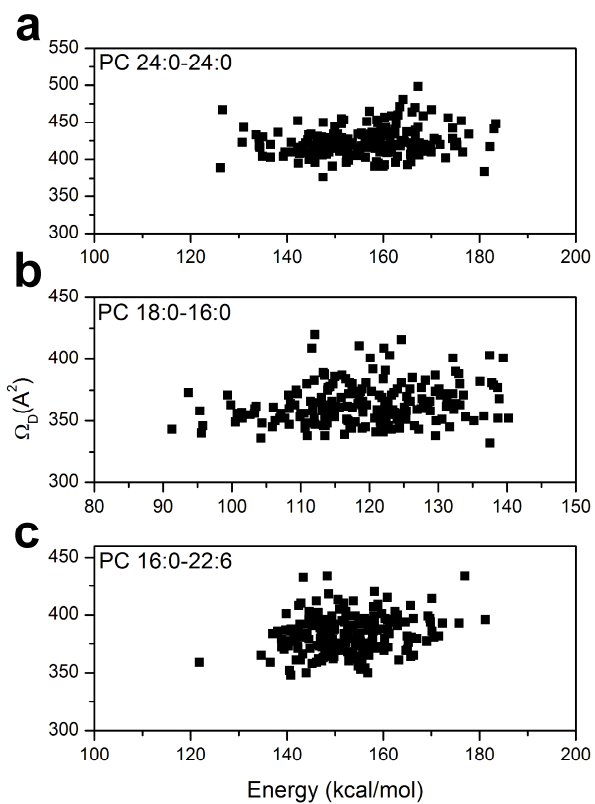

**Table S1.** Mass, drift time, and corrected drift time of ion molecule used in this study.

| Name                            | cationization   | <sup>c</sup> mass | <i>t<sub>d</sub></i> (ms) | <sup>d</sup> <i>t<sub>d</sub>'</i> (ms) |
|---------------------------------|-----------------|-------------------|---------------------------|-----------------------------------------|
| <sup>a</sup> 5:0-5:0 PC         | H <sup>+</sup>  | 426               | 3.58                      | 3.39                                    |
|                                 | Na <sup>+</sup> | 448               | 3.97                      | 3.77                                    |
| <sup>a</sup> 8:0-8:0 PC         | H <sup>+</sup>  | 510               | 4.99                      | 4.78                                    |
|                                 | Na <sup>+</sup> | 532               | 5.50                      | 5.29                                    |
| <sup>a</sup> 11:0-11:0 PC       | H <sup>+</sup>  | 594               | 6.40                      | 6.18                                    |
|                                 | Na <sup>+</sup> | 616               | 6.85                      | 6.62                                    |
| <sup>a</sup> 14:0-16:0 PC       | H <sup>+</sup>  | 706               | 8.06                      | 7.82                                    |
|                                 | Na <sup>+</sup> | 728               | 8.32                      | 8.07                                    |
| <sup>a</sup> 16:0-16:0 PC       | H <sup>+</sup>  | 734               | 8.64                      | 8.39                                    |
|                                 | Na <sup>+</sup> | 756               | 8.77                      | 8.51                                    |
| <sup>a</sup> 18:0-14:0 PC       | H <sup>+</sup>  | 734               | 8.58                      | 8.33                                    |
|                                 | Na <sup>+</sup> | 756               | 8.77                      | 8.51                                    |
| <sup>a,b</sup> 16:0-18:2 PC     | H <sup>+</sup>  | 758               | 8.51                      | 8.26                                    |
| <sup>a</sup> 18:0-16:0 PC       | H <sup>+</sup>  | 762               | 8.96                      | 8.71                                    |
|                                 | Na <sup>+</sup> | 784               | 9.15                      | 8.89                                    |
| <sup>a</sup> 16:0-20:4 PC       | H <sup>+</sup>  | 782               | 8.58                      | 8.32                                    |
| <sup>a,b</sup> 18:0-18:2 PC     | H <sup>+</sup>  | 786               | 8.90                      | 8.64                                    |
| <sup>a</sup> 18:0-18:1 PC       | H <sup>+</sup>  | 788               | 8.96                      | 8.70                                    |
| <sup>a</sup> 18:0-18:0 PC       | H <sup>+</sup>  | 790               | 9.41                      | 9.15                                    |
| <sup>a</sup> 16:0-22:6 PC       | H <sup>+</sup>  | 806               | 8.83                      | 8.57                                    |
| <sup>a</sup> 24:0-24:0 PC       | H <sup>+</sup>  | 958               | 12.2                      | 11.9                                    |
| <sup>b</sup> KK (cytC)          | H <sup>+</sup>  | 275               | 1.86                      | 1.70                                    |
| <sup>b</sup> HK (cytC)          | H <sup>+</sup>  | 284               | 1.86                      | 1.70                                    |
| <sup>b</sup> GKK (cytC)         | H <sup>+</sup>  | 332               | 2.37                      | 2.20                                    |
| <sup>b</sup> GGGGGG             | H <sup>+</sup>  | 362               | 2.18                      | 2.00                                    |
| <sup>b</sup> ATNE (cytC)        | H <sup>+</sup>  | 434               | 3.20                      | 3.01                                    |
| <sup>b</sup> AAAAAA             | H <sup>+</sup>  | 446               | 3.14                      | 2.94                                    |
| <sup>b</sup> KATNE (cytC)       | H <sup>+</sup>  | 563               | 4.29                      | 4.07                                    |
| <sup>b</sup> Ac-GDVEK (cytC)    | H <sup>+</sup>  | 590               | 4.80                      | 4.58                                    |
| <sup>b</sup> GITWK (cytC)       | H <sup>+</sup>  | 605               | 5.12                      | 4.89                                    |
| <sup>b</sup> IFVQK (cytC)       | H <sup>+</sup>  | 635               | 5.70                      | 5.46                                    |
| <sup>b</sup> YIPGTK (cytC)      | H <sup>+</sup>  | 679               | 6.02                      | 5.78                                    |
| <sup>b</sup> MIFAGIK (cytC)     | H <sup>+</sup>  | 780               | 7.36                      | 7.10                                    |
| <sup>b</sup> Bradykinin         | H <sup>+</sup>  | 1061              | 10.2                      | 9.94                                    |
| <sup>b</sup> TGPNLHGLFGR (cytC) | H <sup>+</sup>  | 1169              | 11.8                      | 11.5                                    |

<sup>a</sup>Molecules examined in this study. <sup>b</sup>Molecules used as calibrant. <sup>c</sup>All ions are singly charged. <sup>d</sup>Mass dependent corrected drift time.

**Table S2.** Optimized partial charge distribution of protonated phosphate from the DFT calculation of protonated dimethyl phosphate. The partial charges with atom types for CHARMM force field are tabulated.

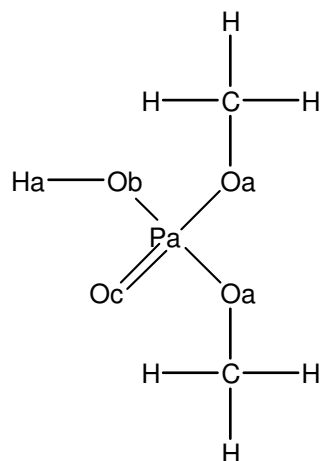

|    | Mulliken Charge <sup>a</sup> | Force Field Charge | Force Field type |
|----|------------------------------|--------------------|------------------|
| Pa | 1.16                         | 1.50               | PL               |
| Oa | -0.51                        | -0.49              | OSL              |
| Ob | -0.54                        | -0.52              | OHL              |
| Oc | -0.57                        | -0.56              | O2L              |
| Ha | 0.35                         | 0.36               | HOL              |

<sup>a</sup>Computed from density functional theory (DFT) calculation using Jaguar 6.0 of Schroedinger company with B3LYP functional and 6-31G\*\* basis set.

**Table S3.**

| Name         | <sup>a</sup> Mass | Applied Voltage (V) | <i>t<sub>d</sub></i> (ms) | <sup>b</sup> <i>K<sub>0</sub></i> (cm <sup>2</sup> V <sup>-1</sup> s <sup>-1</sup> ) |
|--------------|-------------------|---------------------|---------------------------|--------------------------------------------------------------------------------------|
| 8:0-8:0 PC   | 510               | 7                   | 6.46                      | 0.447                                                                                |
|              |                   | 7.5                 | 5.504                     | 0.453                                                                                |
|              |                   | 8                   | 4.99                      | 0.448                                                                                |
|              |                   | 8.5                 | 4.16                      | 0.463                                                                                |
| 14:0-16:0 PC | 706               | 7                   | 10.8                      | 0.344                                                                                |
|              |                   | 7.5                 | 9.28                      | 0.347                                                                                |
|              |                   | 8                   | 8.06                      | 0.350                                                                                |
|              |                   | 8.5                 | 7.04                      | 0.353                                                                                |
| 18:0-18:0 PC | 790               | 7                   | 12.3                      | 0.323                                                                                |
|              |                   | 7.5                 | 10.6                      | 0.324                                                                                |
|              |                   | 8                   | 9.41                      | 0.324                                                                                |
|              |                   | 8.5                 | 8.16                      | 0.328                                                                                |

<sup>a</sup>All ions are singly charged. <sup>b</sup>Evaluated using equations from Shavartsburg and Smith.<sup>29</sup>
